# Supplementary material
Source: publisher figshare collection journal article supplement (https://acs.figshare.com/ndownloader/files/10531396)
Supplement: Supplementary file 1 [file 10531396]

## Supporting Information

Dynamic photoelectrochemical device using electrolyte-permeable  
NiO<sub>x</sub>/SiO<sub>2</sub>/Si photocathode with an open circuit potential of 0.75 V

Jin-Young Jung, Jin-Young Yu and Jung-Ho Lee\*

Departments of Materials and Chemical Engineering, Hanyang University, 55  
Hanyangdaehak-ro, Sangnok-gu, Ansan, Kyeonggi-do 426-791, Republic of Korea

\*Corresponding author:

E-mail: jungho@hanyang.ac.kr

Hanyang University, Korea

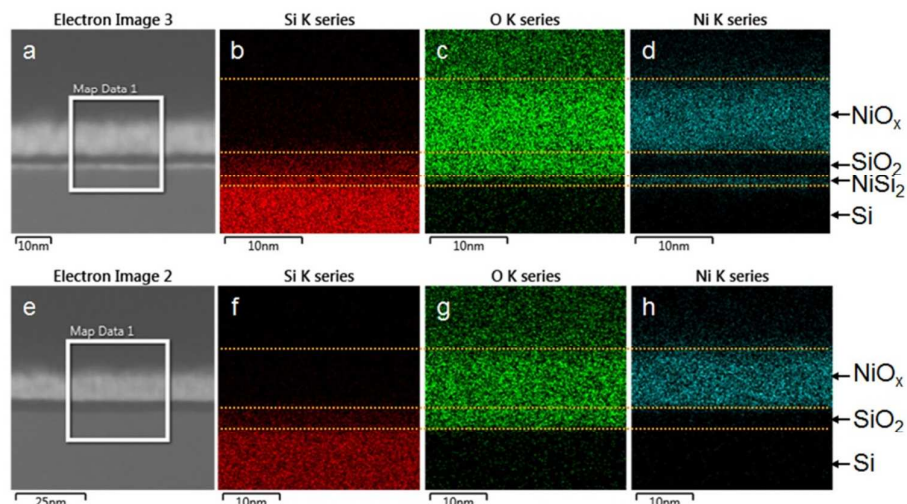

Figure S1. Results of elemental mapping determined using STEM with EDXS for  $\text{NiO}_x$  thin film coated onto (a–d) H-terminated Si and (e–h)  $\text{SiO}_2$ -grown Si.

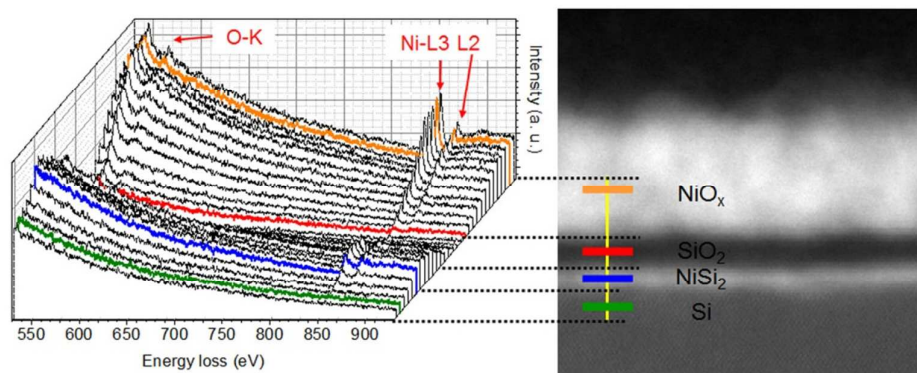

Figure S2. Elemental analysis of electron energy loss spectroscopy (EELS) in the interface layers of  $\text{NiO}_x/\text{SiO}_2/\text{NiSi}_2/\text{Si}$ . In the  $\text{Ni-L}_{2,3}$  edge spectra of  $\text{NiSi}_2$  layer, a branching ratio, defined as the ratio of the  $\text{L}_3$  area to the sum of the  $\text{L}_2$  and  $\text{L}_3$  area, is calculated to be 0.755, indicating the  $\text{NiSi}_2$  phase.

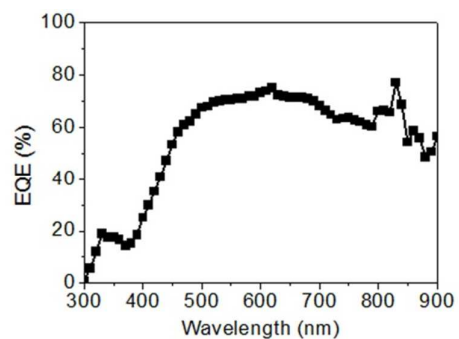

Figure S3. External quantum efficiency of  $\text{NiO}_x/\text{SiO}_2/\text{Si}$  photocathode.

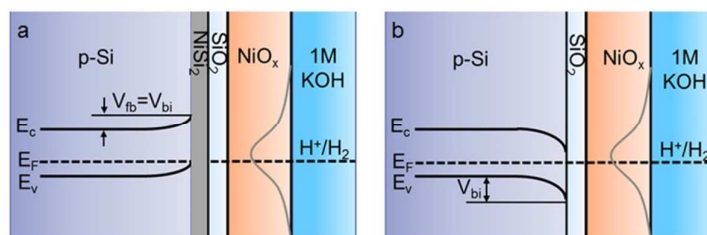

Figure S4. Schematic representation describing the approximate energy band diagrams for (a)  $\text{NiO}_x/\text{Si}$  and (b)  $\text{NiO}_x/\text{SiO}_2/\text{Si}$  photocathodes, based upon the  $V_{bi}$  results shown in Fig. 1d.

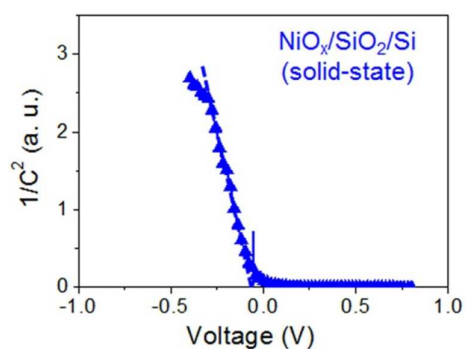

Figure S5. M–S plots obtained for the solid-state device fabricated using  $\text{NiO}_x/\text{SiO}_2/\text{Si}$ .

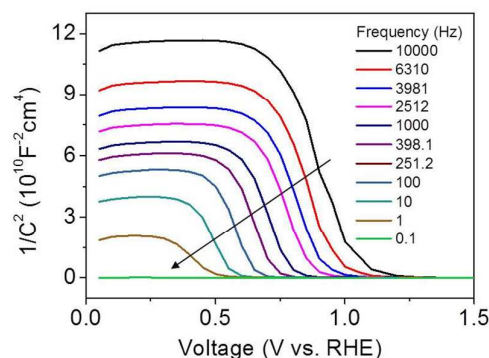

Figure S6. M–S plots obtained for the electrolyte/ $\text{NiO}_x/\text{n}^+\text{-Si}$  at various frequencies (0.1–10,000 Hz) to characterize the energetics of the  $\text{NiO}_x$ /electrolyte system. The changes in  $V_{\text{fb}}$  as a function of frequency show that the Fermi-level of  $\text{NiO}_x$  varies with the reduction rate.

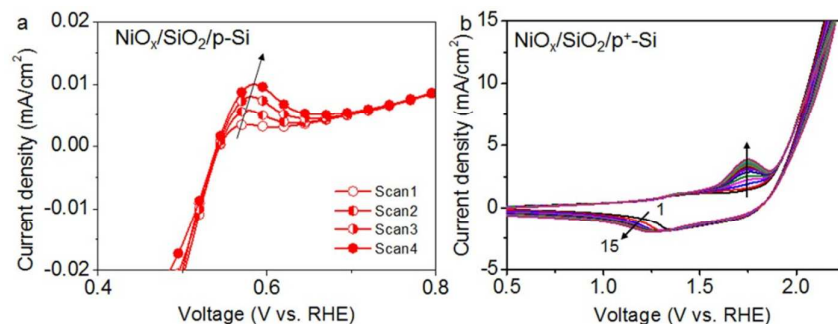

Figure S7. Reduced and oxidized  $\text{NiO}_x$  thin film. (a) Oxidation waves at anodic current region of illuminated LSV curve for  $\text{NiO}_x/\text{SiO}_2/\text{Si}$  photocathode. (b) Cyclic voltammograms for  $\text{NiO}_x/\text{SiO}_2/\text{p}^+\text{-Si}$  in 1 M KOH obtained over 15 cycles at a scan rate of 100 mV/s, indicating the reduction/oxidation of  $\text{NiO}_x$ . The growth and shift for the reduction and oxidation waves with the repetitive cycling of CV is attributed to the increase in the reduction area, i.e., indicating the reduction reaction occurring over the entire bulk and not just the surface as observed in previous works (see Refs. 30 and 40 in the references of main manuscript). Therefore, our  $\text{NiO}_x$  thin film can be regarded to possess an electrolyte-permeable, porous structure, which enables reduction to effectively change the Fermi-level of  $\text{NiO}_x$ .

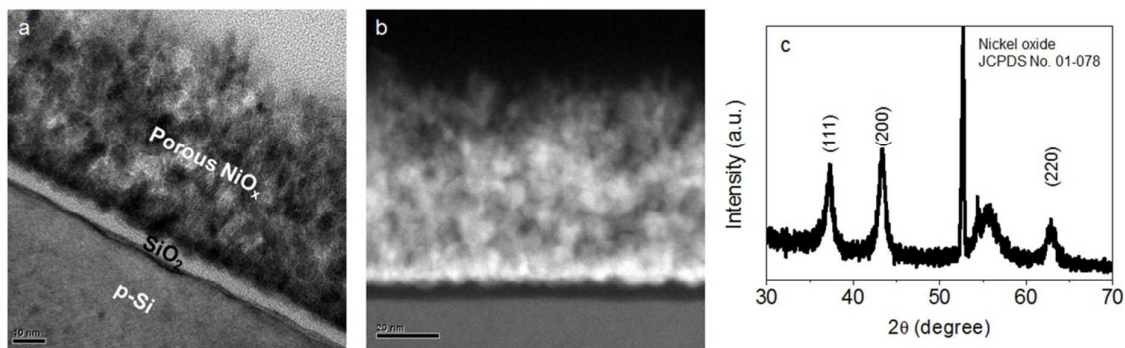

Figure S8. (a) TEM image, (b) STEM image, and (c) X-ray diffraction (XRD) pattern of  $\text{NiO}_x$  thin film of a 40-nm-thin  $\text{NiO}_x$  film coating on a  $\text{SiO}_2$ -grown Si wafer, clearly showing the electrolyte-permeable, poly-crystalline structure of the  $\text{NiO}_x$  thin film with a small grain size in the range of 2 to 5 nm.

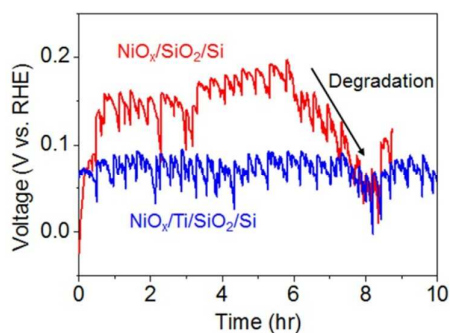

Figure S9. Chronopotentiometry results obtained for  $\text{NiO}_x/\text{SiO}_2/\text{Si}$  photocathode (red) and  $\text{NiO}_x/\text{Ti}/\text{SiO}_2/\text{Si}$  photocathode (blue) under illumination at a constant photocurrent of  $-10 \text{ mA}/\text{cm}^2$ . The improved stability by Ti layer inserted between  $\text{NiO}_x$  and  $\text{SiO}_2$  suggests that  $\text{NiO}_x$  thin film is electrolyte-permeable.

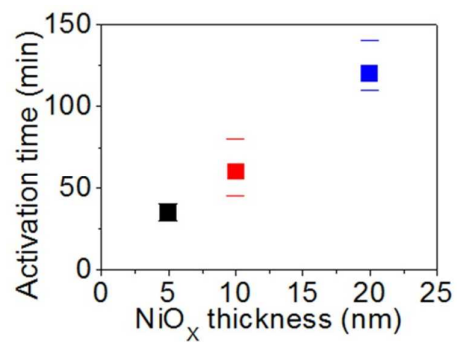

Figure S10. Plot showing NiO<sub>x</sub> thickness dependent activation times required for the saturation of the HER potential level determined using CP measurements shown in Fig. 2b.

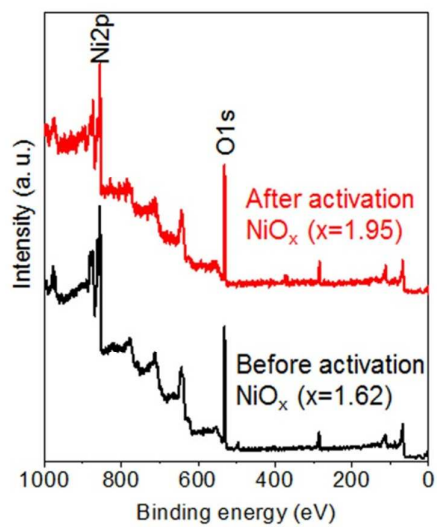

Figure S11. XPS survey spectra of NiO<sub>x</sub> thin film before and after the activation process.

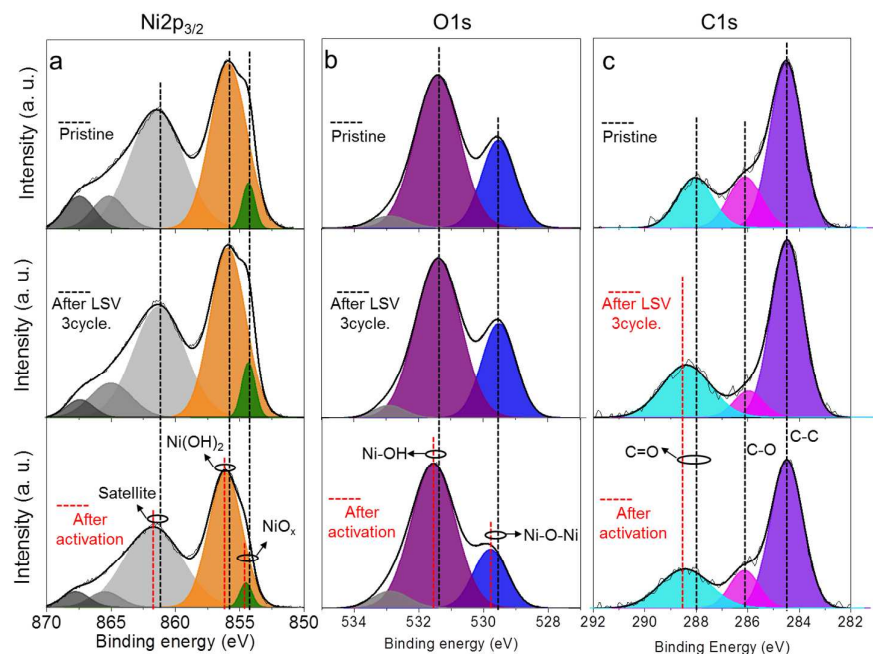

Figure S12. (a) Ni 2p, (b) O 1s, and (c) C 1s XPS spectra of the NiO<sub>x</sub> thin film in pristine (top) and test samples after LSV response for 3 cycles (middle) and activation process (bottom). The obtained results revealed that the peak positions in Ni 2p and O 1s after LSV response for just 3 cycles were unchanged, while the peak positions were shifted for the activation sample. The results in C 1s spectra showed that C=O peak was broadened and shifted to a high-energy side for both the 3 cycle LSV and the activation samples, due to the carbon contamination during PEC reaction.

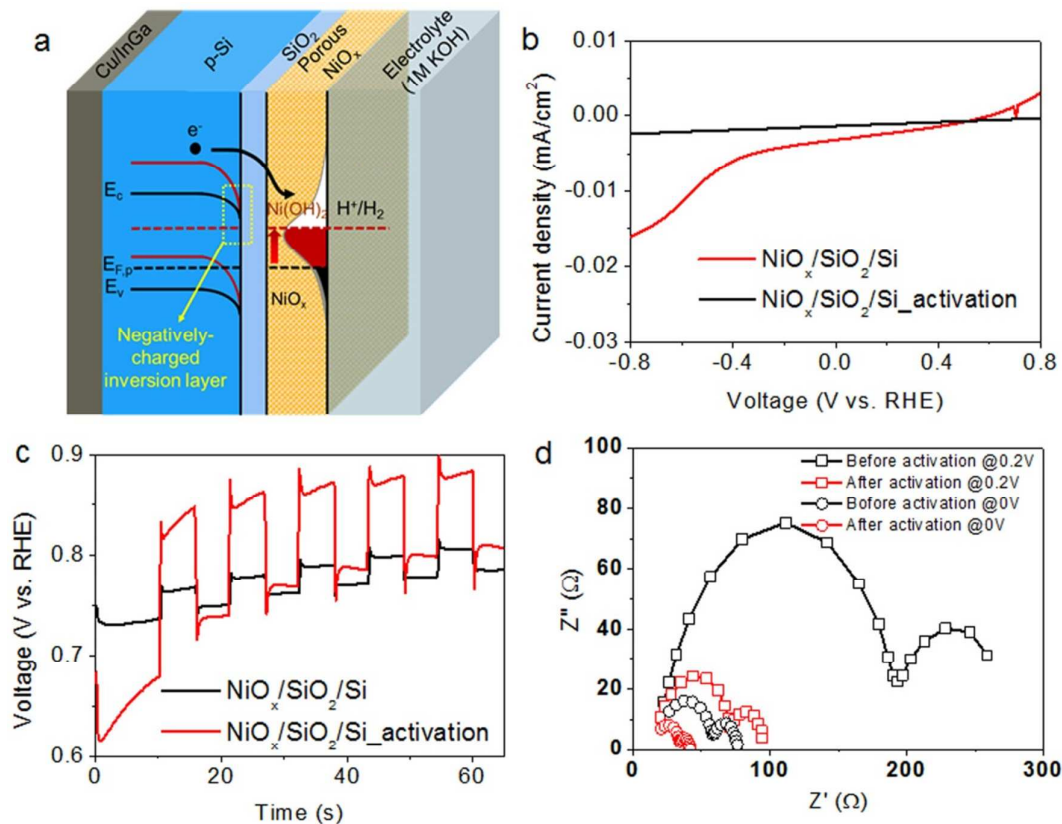

Figure S13. Effect of a large  $V_{bi}$  on PEC performances. (a) Schematic representation showing the structure and approximate energy band diagram of the electrolyte-permeable  $\text{NiO}_x/\text{SiO}_2/\text{Si}$  photocathode with effective change of  $V_{bi}$  induced by the transformation of  $\text{NiO}_x$  into  $\text{Ni(OH)}_2$  over the entire layer. Comparison of PEC performance parameters, including (b) dark (leakage) current, (c) photovoltage, and (d) charge transfer resistance as determined by electrochemical impedance spectroscopy (EIS) before (black) and after (red) the activation process. The decrease in the dark current signifies suppressed recombination loss, which causes an increase in photovoltage. The EIS results show a decrease in the hemisphere diameter after the activation process, thus indicating an improvement in charge transfer kinetics.



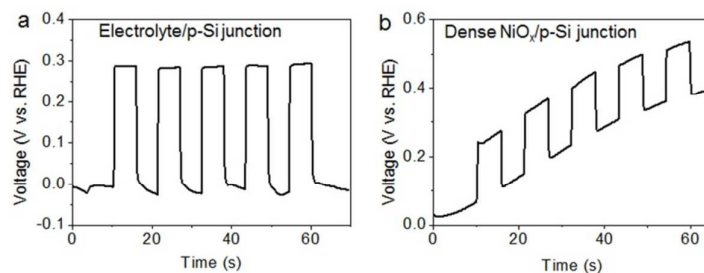

Figure S14. The  $V_{ph}$  results for (a) the electrolyte/p-Si junction and (b) the dense NiO<sub>x</sub>/p-Si junction. The dense NiO<sub>x</sub> was deposited by sputtering process.

In case of the nano-sized, porous structures, the mixed potential due to two partial reactions of NiO<sub>x</sub> and KOH electrolyte can be also considered to affect an interfacial energetics of the Si photocathode. But, the mixed potential can be excluded from our study because they should generate a constant  $V_{ph}$ , as observed in an electrolyte/p-Si junction and an electrolyte-impermeable NiO<sub>x</sub>/Si junction (Supplementary Fig. S14).

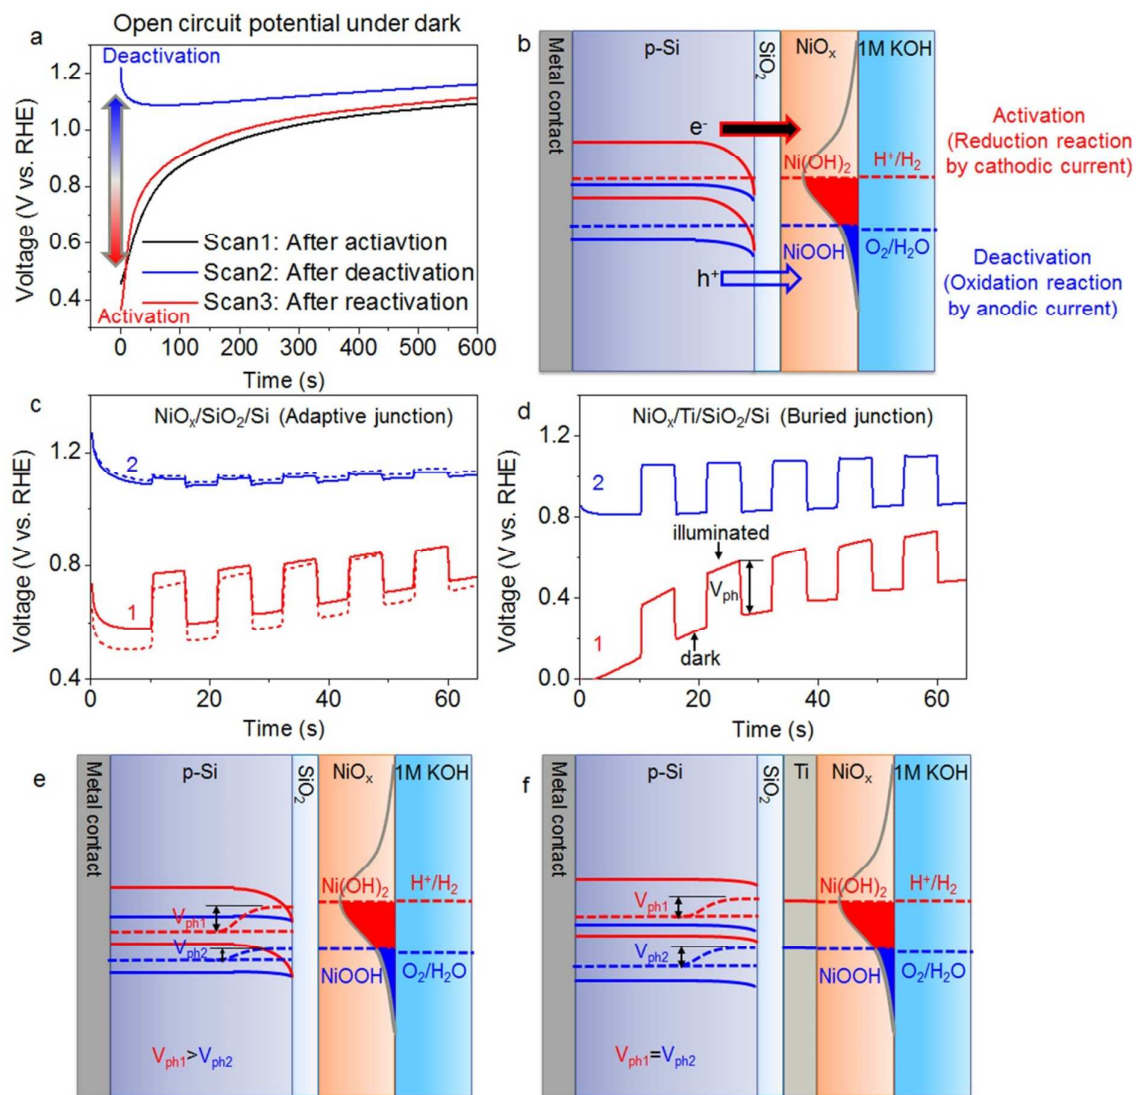

Figure S15. Change in  $V_{ph}$  for the adaptive junction. (a) Potential measurement of the  $NiO_x/SiO_2/Si$  photocathode as a function of time under open circuit conditions in the dark after preconditions such as activation, deactivation, and reactivation. After the activation process performed by operation of the HER (reduction reaction), the open circuit potential under dark conditions ( $OCP_{@dark}$ ) was found to be at the most cathodic potential level (see black curve). However, during the measurement, an anodic shift in the  $OCP_{@dark}$  level was observed with increasing time due to deactivation, caused by tunneling of the majority of hole carriers ( $h^+$ ) from Si into  $NiO_x$  (oxidation reaction). When the potential measurement was implemented just after deactivation, the  $OCP_{@dark}$  remained at a potential level of ~1.2 V under dark conditions (see blue curve). After operating the HER again for reactivation (see red curve), the  $OCP_{@dark}$  returned to the initial potential level of the black curve. (b) Schematic illustrations show the band diagram of the  $NiO_x/SiO_2/Si$  photocathode under dark conditions in an equilibrium state just after activation and deactivation. (c–f) The  $V_{ph}$  measurements and schematic illustrations of the band diagram of the  $NiO_x/SiO_2/Si$  photocathode (c, e) and  $NiO_x/Ti/SiO_2/Si$  (d, f).

photocathode (d, f). The  $V_{ph}$  measurements were carried out in two consecutive runs. The  $V_{ph}$  for the  $NiO_x/SiO_2/Si$  photocathode changed as a function of varying  $OCP_{@dark}$ , while that for the  $NiO_x/Ti/SiO_2/Si$  photocathode remained unchanged.

As described in Supplementary Figs. S15(a) and (b), the changes in  $OCP_{@dark}$  indicate that the Fermi level of  $NiO_x$  is altered according to the reduction reaction (activation) by the cathodic current and the oxidation reaction (deactivation) by the anodic current. After the HER (activation), the reduction level for  $Ni(OH)_2$  was matched to the Fermi level of p-Si at the equilibrium state (see red lines in Supplementary Figs. S15(e) and (f)). Whereas the oxidation level for  $NiOOH$  was matched after the potential measurement under open circuit conditions in darkness (deactivation, see blue lines in Supplementary Figs. S15(e) and (f)). Consequently, the change in  $V_{ph}$  for the  $NiO_x/SiO_2/Si$  photocathode with an anodic shift of the  $OCP_{@dark}$  was evident for the adaptive  $NiO_x/Si$  junction (see Supplementary Figs. S15(c) and (e)). On the other hand, the unchanged  $V_{ph}$  for the  $NiO_x/Ti/SiO_2/Si$  photocathode evidences the buried Ti/Si junction (see Figs. S15(d) and (f)).

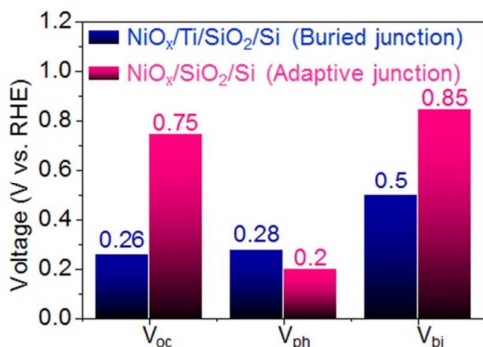

Figure S16. Comparison of PEC performance trends using parameters such as  $OCP$ ,  $V_{ph}$ , and  $V_{bi}$  for  $NiO_x/SiO_2/Si$  and  $NiO_x/Ti/SiO_2/Si$  photocathodes.

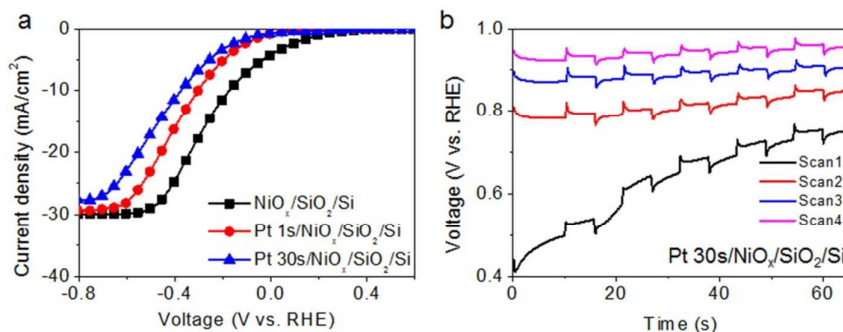

Figure S17. (a) LSV responses and (b) photovoltage measurements obtained for the Pt catalyst-coated  $NiO_x/SiO_2/Si$  photocathode. The cathodic shift of the LSV curve and the fixed value of  $V_{ph}$ , indicate degradation in the PEC performance and the dissipation of the adaptive junction behavior, respectively.

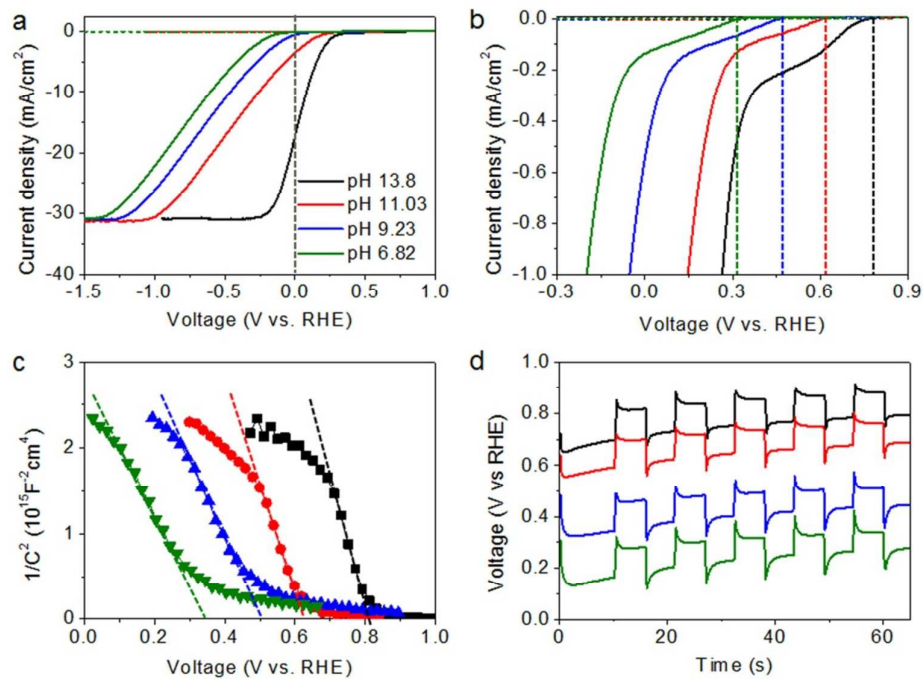

Figure S18. Redox potential (electrolyte pH) dependent OCP and  $V_{bi}$  (a, b) LSV responses, (c) M–S plots, and (d) photovoltage measurements obtained for the  $\text{NiO}_x/\text{SiO}_2/\text{Si}$  photocathode at different electrolyte pH levels (6.8–13.8). The vertical dot lines denote the OCPs. The changes in both  $V_{fb}$  and OCP as a function of electrolyte pH indicate that the redox potential level contributed to the interfacial energetics of the adaptive  $\text{NiO}_x/\text{Si}$  junction. By contrast, the maximum  $V_{ph}$  remained nearly unchanged, suggesting that OCP is independent of  $V_{ph}$ .

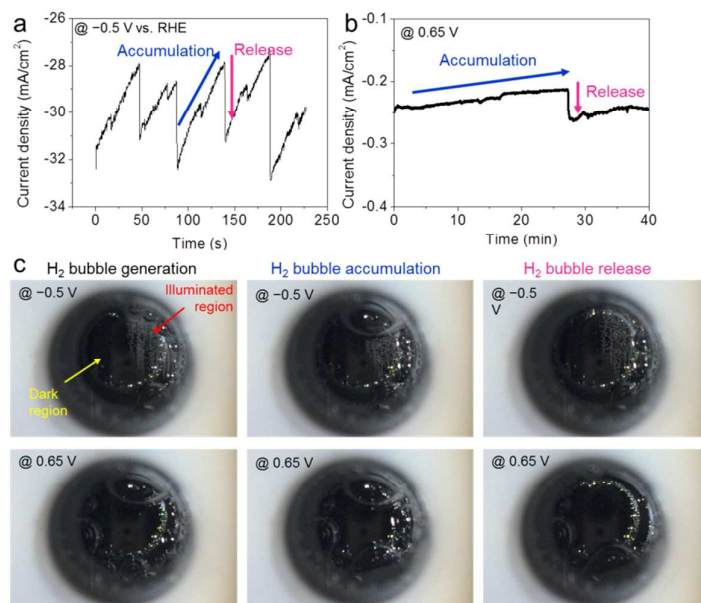

Figure S19. Chronoamperometry measurements of NiO<sub>x</sub>/SiO<sub>2</sub>/Si photocathode at applied (a) -0.5 V (vs RHE) generating a limited current of ~32 mA/cm<sup>2</sup> and (b) 0.65 V (vs. RHE) close to the 0.75 V OCP. (c) Digital photos showing the representative conditions of H<sub>2</sub> bubbles.

The chronoamperometry curves of the Si photocathode (Figure S19a and b) and digital photos reflecting some status of hydrogen bubbles in the chronoamperometry (Figure S19c) exhibited the H<sub>2</sub> bubble generation, accumulation, and release during PEC reactions. Applying -0.5 V vs. RHE generating a limited current of ~32 mA/cm<sup>2</sup> generated a large amount of H<sub>2</sub> bubbles only at the illuminated region (see top left image), and the generated H<sub>2</sub> bubble was accumulated at the edge of samples (top middle) and finally released when no longer sustained for accumulation (top right). More specifically, the current density level gradually declined when bubbles accumulated; then restores its original current level at the release of bubbles. Applying 0.65 V close to the OCP, accumulation and release of bubbles still happened even though bubble generation was not clearly observed, displaying the OCP resulted from the Faradaic reaction of H<sub>2</sub> evolution.

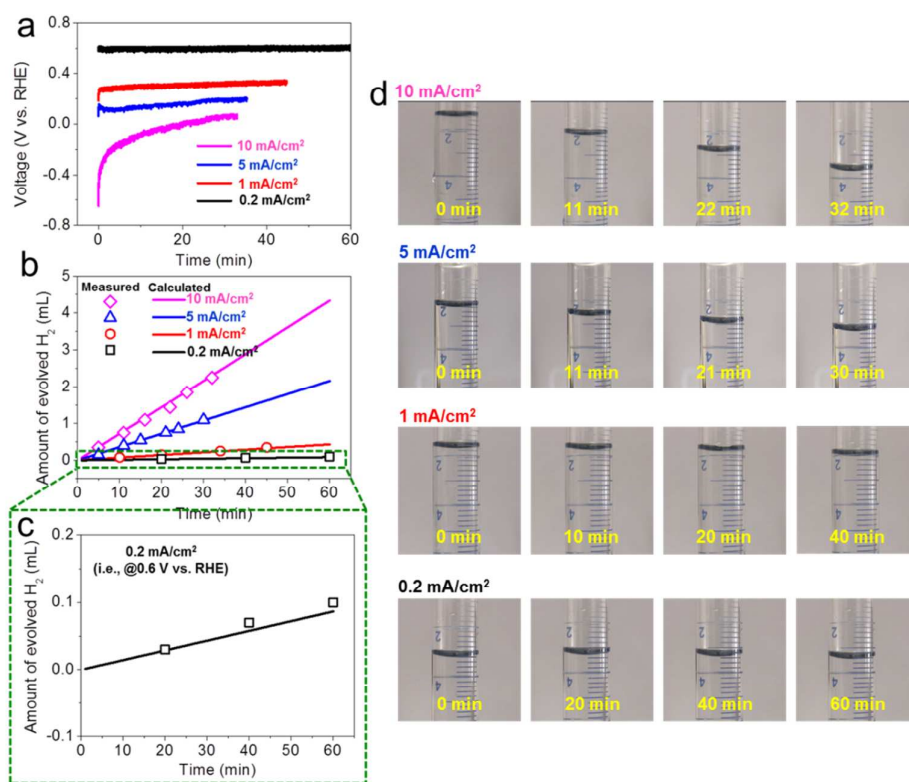

Figure S20. Hydrogen evolution measured by volume displacement. (a) Chronopotentiometry measurements of NiO<sub>x</sub>/SiO<sub>2</sub>/Si photocathode with varying the current levels from 0.2 to 10 mA/cm<sup>2</sup>. (b, c) Plots showing an amount of the H<sub>2</sub> evolved under the chronopotentiometry measurements of (a). Symbols (measured) and solid lines (calculated) denote the volumes of collected hydrogen. The panel (c) represents a low volume level range (<0.2 mL) of the panel (b). (d) Digital photos showing the volume changes corresponding to the measured results of panel (b). The volume changes were observed by the water menisci inside a graduated flask suppressed due to H<sub>2</sub> evolution from the top-side of the flask.

We have measured the amount of H<sub>2</sub> evolved during chronopotentiometry operation at varying the current levels from 0.2 to 10 mA/cm<sup>2</sup>, as shown in Figure S20. The volume change observed at the low current level of 0.2 mA/cm<sup>2</sup> close to the OCP means that the H<sub>2</sub> evolution occurs even in the OCP. In addition, the measured H<sub>2</sub> volumes were estimated to be closely matched to the calculated values from the Faraday's law of electrolysis, indicating a 100% Faraday efficiency.

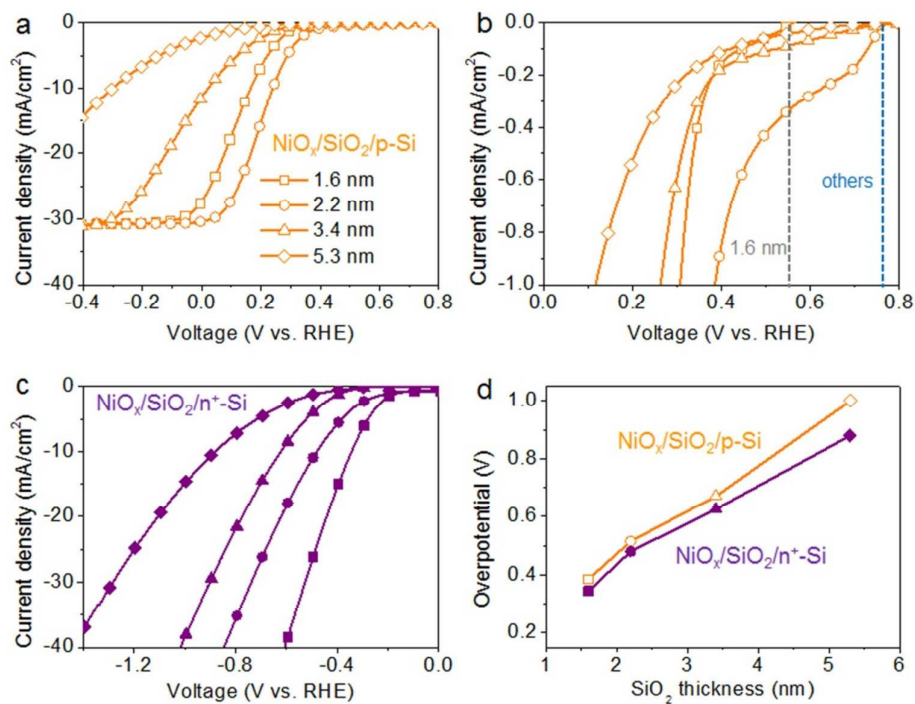

Figure S21. Increased charge transfer resistance with SiO<sub>2</sub> thickness. (a, b) Illuminated LSV responses of the NiO<sub>x</sub>/SiO<sub>2</sub>/p-Si samples with varying SiO<sub>2</sub> thickness. The plot in (b) represents the low photocurrent density level range (< -1 mA/cm<sup>2</sup>) of the plot shown in (a), and used to identify the OCP. (c) dark LSV responses of the NiO<sub>x</sub>/SiO<sub>2</sub>/n<sup>+</sup>-Si samples. (d) Plots showing overpotentials of both the p-Si and the n<sup>+</sup>-Si samples with SiO<sub>2</sub> thickness.
